# Supplementary material for: Fast fabrication of stable cartilage-like tissue using collagen hydrogel microsphere culture
Source: Royal Society of Chemistry journal article supplement (doi:10.1039/c7tb02535a), 2017-01-01
Supplement: c7tb02535a1.pdf [file c7tb02535a1.pdf]

### SUPPLEMENTAL DATA

Sup. Fig. 1 shows the bulk tissue made with CHM. The storage modulus of sample was measured with a dynamic mechanical analyzer (TA-Q800, USA) in the compression mode at room temperature.

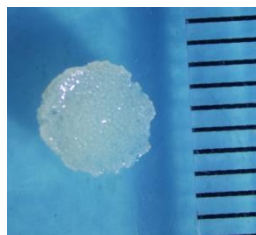

| Frequency | Storage modulus |
|-----------|-----------------|
| 1 Hz      | 43.62 kPa       |
| 2 Hz      | 44.95 kPa       |
| 5 Hz      | 51.22 kPa       |

Sup. Fig. 1: Fabricate bulk tissue with CHM. Left: Photo of sample. Right: Storage modulus of sample.
